# Supplementary material for: Lineage tracing reveals the dynamic contribution of Hes1+ cells to the developing and adult pancreas
Source: Oxford University Press journal article supplement (doi:10.1242/dev.053843), 2011-01-04
Supplement: dev053843-tables2.pdf [file dev053843-tables2.pdf]

**Table S2. Cell counts for calculations of adult labeling indices**

| Experiment | Timepoint                    | Markers scored        | Number of mice | Number of fields/mouse | Total number of marker* cells scored |
|------------|------------------------------|-----------------------|----------------|------------------------|--------------------------------------|
| Fig. 5     | 7-day chase                  | Amylase               | 6              | 7-9                    | 23252                                |
|            |                              | CK19                  |                |                        | 4174                                 |
|            | 2-month chase                | Amylase               | 10             | 4-7                    | 25445                                |
|            |                              | CK19                  |                |                        | 4167                                 |
|            | 7-day chase<br>2-month chase | CK19 <sup>+</sup> CAC | 3              | 5-6                    | 336<br>222                           |
| Fig. 7     | 7 days post                  | CK19                  | 5              | 5-6                    | 8762                                 |
|            |                              | E-cadherin            |                |                        | 9603                                 |
| Fig. S9    | 7-day chase                  | Glucagon              | 6              | 5-8                    | 2205                                 |
|            |                              | Insulin               | 3              | 4-7                    | 2002                                 |
|            | 2-month chase                | Glucagon              | 4              | 5-7                    | 1167                                 |
|            |                              | Insulin               | 3              | 5-9                    | 2216                                 |

For each figure, we list the number of adult mice analyzed per timepoint, the number of microscopic fields scored per mouse and the total number of \*differentiation marker-expressing cells (across all mice) scored for co-expression of the *R26R<sup>EYFP</sup>* lineage marker. Note that for the duct ligation experiments (Fig. 7), we manually scanned the entire surface of each slide for labeling of insulin<sup>+</sup> cells, using the specimens scored here for labeling of CK19<sup>+</sup> and E-cadherin<sup>+</sup> cells, as well as additional specimens in which CK19<sup>+</sup> and E-cadherin<sup>+</sup> cells were not analyzed.
