# Supplementary figures and images for: Lineage tracing reveals the dynamic contribution of Hes1+ cells to the developing and adult pancreas
Source: Oxford University Press journal article supplement (doi:10.1242/dev.053843), 2011-01-04

control

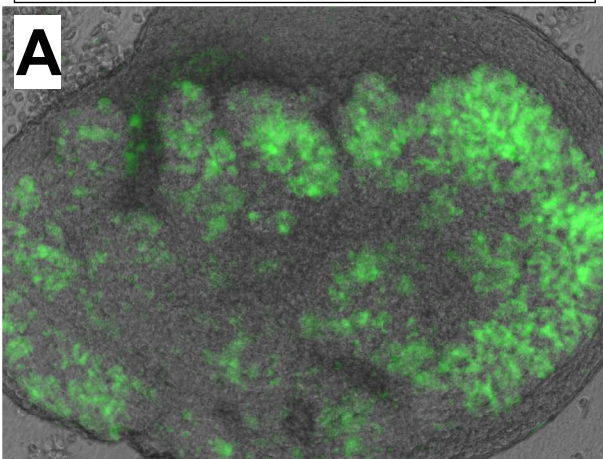

DAPT

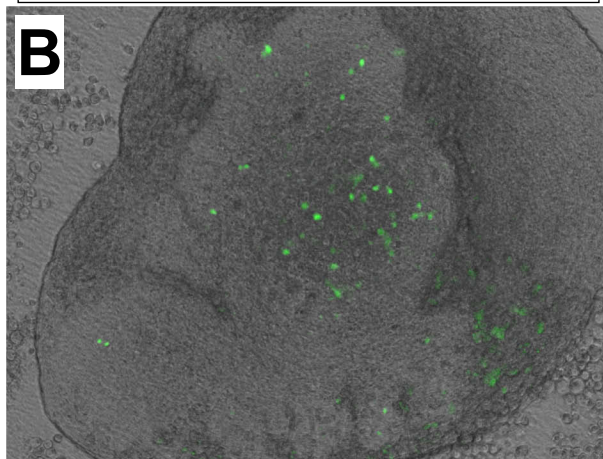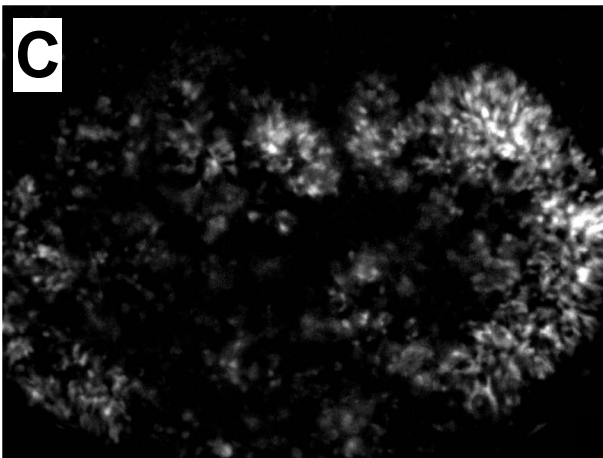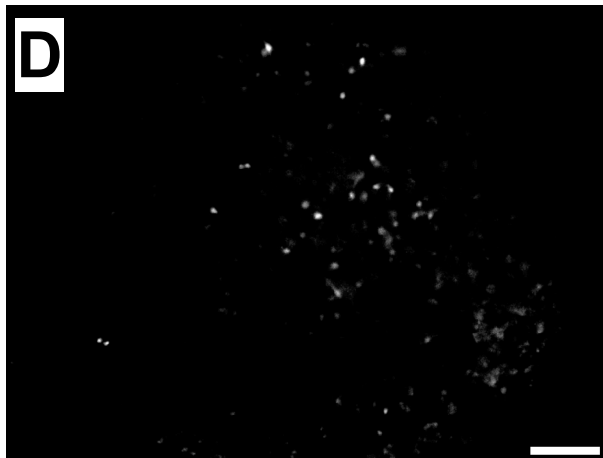

Supplement: dev053843figs5.pdf [file dev053843figs5.pdf]

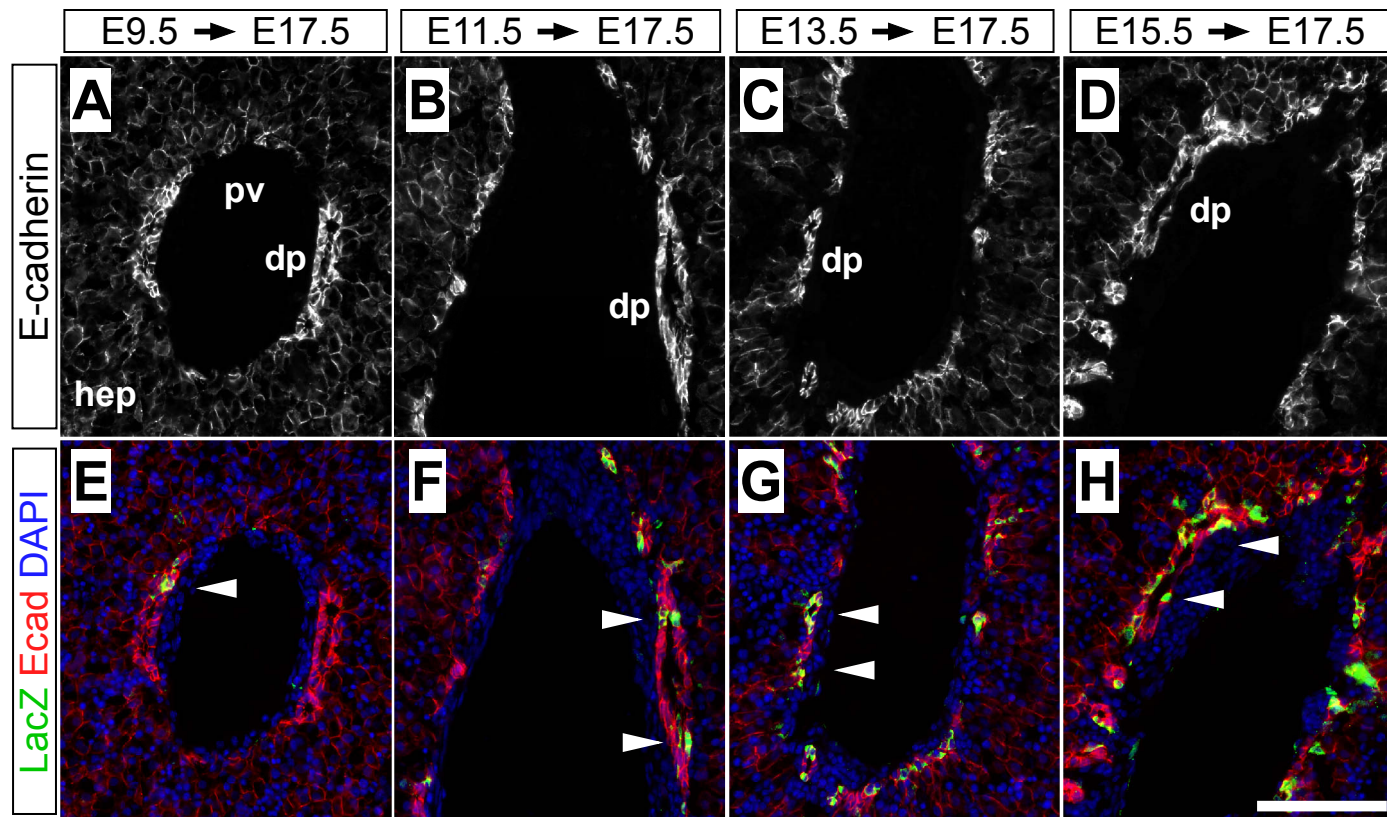

Supplement: dev053843figs6.pdf [file dev053843figs6.pdf]
